# Supplementary material for: Prospective, multicenter study of P4HB (Phasix™) mesh for hernia repair in cohort at risk for complications: 3-Year follow-up
Source: PubMed Central journal article supplement (PMC7750179; doi:10.1016/j.amsu.2020.12.002), 2020-12-15
Supplement: mmc1.pdf [file mmc1.pdf]

## The STROCSS 2019 Guideline

| Item no.            | Item description                                                                                                                                                                                                                                                                                                                                                                                                                                                                                             | Page                                                         |
|---------------------|--------------------------------------------------------------------------------------------------------------------------------------------------------------------------------------------------------------------------------------------------------------------------------------------------------------------------------------------------------------------------------------------------------------------------------------------------------------------------------------------------------------|--------------------------------------------------------------|
| <b>TITLE</b>        |                                                                                                                                                                                                                                                                                                                                                                                                                                                                                                              |                                                              |
| 1                   | <p>Title:</p> <ul style="list-style-type: none"> <li>- The word cohort or cross-sectional or case-controlled is included</li> <li>- The area of focus is described (e.g. disease, exposure/intervention, outcome)</li> <li>- Key elements of study design are stated (e.g. retrospective or prospective)</li> </ul>                                                                                                                                                                                          | <p>-Title Page</p> <p>-Title Page</p> <p>-Title Page</p>     |
| <b>ABSTRACT</b>     |                                                                                                                                                                                                                                                                                                                                                                                                                                                                                                              |                                                              |
| 2a                  | <p>Introduction: the following points are briefly described</p> <ul style="list-style-type: none"> <li>- Background</li> <li>- Scientific Rationale for this study</li> </ul>                                                                                                                                                                                                                                                                                                                                | Abstract pg.1                                                |
| 2b                  | <p>Methods: the following areas are briefly described</p> <ul style="list-style-type: none"> <li>- Study design (cohort, retro-/prospective, single/multi-centred)</li> <li>- Patient populations and/or groups, including control group, if applicable</li> <li>- Interventions (type, operators, recipients, timeframes)</li> <li>- Outcome measures</li> </ul>                                                                                                                                            | Abstract pg.1                                                |
| 2c                  | <p>Results: the following areas are briefly described</p> <ul style="list-style-type: none"> <li>- Summary data (with statistical relevance) with qualitative descriptions, where appropriate</li> </ul>                                                                                                                                                                                                                                                                                                     | Abstract pg.1                                                |
| 2d                  | <p>Conclusion: the following areas are briefly described</p> <ul style="list-style-type: none"> <li>- Key conclusions</li> <li>- Implications to practice</li> <li>- Direction of and need for future research</li> </ul>                                                                                                                                                                                                                                                                                    | Abstract pg.1                                                |
| <b>INTRODUCTION</b> |                                                                                                                                                                                                                                                                                                                                                                                                                                                                                                              |                                                              |
| 3                   | <p>Introduction: the following areas are described in full</p> <ul style="list-style-type: none"> <li>- Relevant background and scientific rationale</li> <li>- Aims and objectives</li> <li>- Research question and hypotheses, where appropriate</li> </ul>                                                                                                                                                                                                                                                | <p>Sec 1 pg.2</p> <p>Sec 2 pg. 2</p>                         |
| <b>METHODS</b>      |                                                                                                                                                                                                                                                                                                                                                                                                                                                                                                              |                                                              |
| 4a                  | <p>Registration and ethics</p> <ul style="list-style-type: none"> <li>- Research Registry number is stated, in accordance with the declaration of Helsinki*</li> <li>- All studies (including retrospective) should be registered before submission</li> </ul> <p><i>**Every research study involving human subjects must be registered in a publicly accessible database before recruitment of the first subject" (this can be obtained from: ResearchRegistry.com or ClinicalTrials.gov or ISRCTN)</i></p> | <p>Sec 2 pg.2</p> <p>Clinical Trials.gov (NCT 0196 1687)</p> |
| 4b                  | <p>Ethical Approval: the following areas are described in full</p> <ul style="list-style-type: none"> <li>- Necessity for ethical approval</li> <li>- Ethical approval, with relevant judgement reference from ethics committees</li> <li>- Where ethics was unnecessary, reasons are provided</li> </ul>                                                                                                                                                                                                    | Sec 2 pg.3                                                   |

|                                        |                                                                                                                                                                                                                                                                                                                                                                               |                                                                                                                                     |
|----------------------------------------|-------------------------------------------------------------------------------------------------------------------------------------------------------------------------------------------------------------------------------------------------------------------------------------------------------------------------------------------------------------------------------|-------------------------------------------------------------------------------------------------------------------------------------|
| 4c                                     | Protocol: the following areas are described comprehensively <ul style="list-style-type: none"> <li>- Protocol (<i>a priori</i> or otherwise) details, with access directions</li> <li>- If published, journal mentioned with the reference provided</li> </ul>                                                                                                                | Sec 2<br>pg. 2-4                                                                                                                    |
| 4d                                     | Patient Involvement in Research <ul style="list-style-type: none"> <li>- Describe how, if at all, patients were involved in study design e.g. were they involved on the study steering committee, did they provide input on outcome selection, etc.</li> </ul>                                                                                                                | n/a                                                                                                                                 |
| 5a                                     | Study Design: the following areas are described comprehensively <ul style="list-style-type: none"> <li>- 'Cohort' study is mentioned</li> <li>- Design (e.g. retro-/prospective, single/multi-centred)</li> </ul>                                                                                                                                                             | Sec 2.1<br>pg. 2                                                                                                                    |
| 5b                                     | Setting: the following areas are described comprehensively <ul style="list-style-type: none"> <li>- Geographical location</li> <li>- Nature of institution (e.g. academic/community, public/private)</li> <li>- Dates (recruitment, exposure, follow-up, data collection)</li> </ul>                                                                                          | Sec 2.1<br>pg. 3<br><br>See Title page for institution names, locations, and types.<br><br>Sec 2.2<br>pg. 3<br><br>Sec 2.4<br>pg. 4 |
| 5c                                     | Cohort Groups: the following areas are described in full <ul style="list-style-type: none"> <li>- Number of groups</li> <li>- Division of intervention between groups</li> </ul>                                                                                                                                                                                              | Sec 2.2<br>pg. 3<br>Incl and Excl criteria                                                                                          |
| 5d                                     | Subgroup Analysis: the following areas are described comprehensively <ul style="list-style-type: none"> <li>- Planned subgroup analyses</li> <li>- Methods used to examine subgroups and their interactions</li> </ul>                                                                                                                                                        | Sec 2.6<br>pg. 4                                                                                                                    |
| 6a                                     | Participants: the following areas are described comprehensively <ul style="list-style-type: none"> <li>- Eligibility criteria</li> <li>- Recruitment sources</li> <li>- Length and methods of follow-up</li> </ul>                                                                                                                                                            | Sec 2.2<br>pg. 3<br>Incl and Excl criteria<br><br>Sec 2.4-2.5<br>pg. 4                                                              |
| 6b                                     | Recruitment: the following areas are described comprehensively <ul style="list-style-type: none"> <li>- Methods of recruitment to each patient group</li> <li>- Period of recruitment</li> </ul>                                                                                                                                                                              | Sec 2.2<br>pg. 3                                                                                                                    |
| 6c                                     | Sample Size: the following areas are described comprehensively <ul style="list-style-type: none"> <li>- Margin of error calculation</li> <li>- Analysis to determine study population</li> <li>- Power calculations, where appropriate</li> </ul>                                                                                                                             | Sec 2.1<br>pg. 3                                                                                                                    |
| <b>INTERVENTION AND CONSIDERATIONS</b> |                                                                                                                                                                                                                                                                                                                                                                               |                                                                                                                                     |
| 7a                                     | Pre-intervention Considerations: the following areas are described comprehensively <ul style="list-style-type: none"> <li>- Patient optimisation (pre-surgical measures)</li> <li>- Pre-intervention treatment (hypothermia/-volaemia/-tension; ICU care; bleeding problems; medications)</li> </ul>                                                                          | n/a                                                                                                                                 |
| 7b                                     | Intervention: the following areas are described comprehensively <ul style="list-style-type: none"> <li>- Type of intervention and reasoning (e.g. pharmacological, surgical, physiotherapy, psychological)</li> <li>- Aim of intervention (preventative/therapeutic)</li> <li>- Concurrent treatments (antibiotics, analgesia, anti-emetics, NBM, VTE prophylaxis)</li> </ul> | Sec 2.1-2.3<br>pg. 2-4                                                                                                              |

|                |                                                                                                                                                                                                                                                                                                                                                                                                                                                   |                                                                            |
|----------------|---------------------------------------------------------------------------------------------------------------------------------------------------------------------------------------------------------------------------------------------------------------------------------------------------------------------------------------------------------------------------------------------------------------------------------------------------|----------------------------------------------------------------------------|
|                | - Manufacturer and model details where applicable                                                                                                                                                                                                                                                                                                                                                                                                 |                                                                            |
| 7c             | Intra-Intervention Considerations: the following areas are described comprehensively <ul style="list-style-type: none"> <li>- Administration of intervention (location, surgical details, anaesthetic, positioning, equipment needed, preparation, devices, sutures, operative time)</li> <li>- Pharmacological therapies include formulation, dosages, routes and durations</li> <li>- Figures and other media are used to illustrate</li> </ul> | Sec 2.3<br>pg. 3-4                                                         |
| 7d             | Operator Details: the following areas are described comprehensively <ul style="list-style-type: none"> <li>- Training needed</li> <li>- Learning curve for technique</li> <li>- Specialisation and relevant training</li> </ul>                                                                                                                                                                                                                   | Sec 2.3<br>pg. 3-4                                                         |
| 7e             | Quality Control: the following areas are described comprehensively <ul style="list-style-type: none"> <li>- Measures taken to reduce variation</li> <li>- Measures taken to ensure quality and consistency in intervention delivery</li> </ul>                                                                                                                                                                                                    | Sec 2.3<br>pg. 3-4                                                         |
| 7f             | Post-Intervention Considerations: the following areas are described comprehensively <ul style="list-style-type: none"> <li>- Post-operative instructions and care</li> <li>- Follow-up measures</li> <li>- Future surveillance requirements (e.g. imaging, blood tests)</li> </ul>                                                                                                                                                                | Sec 2.3<br>pg. 3-4<br><br>Sec 2.4<br>pg. 4                                 |
| 8              | Outcomes: the following areas are described comprehensively <ul style="list-style-type: none"> <li>- Primary outcomes, including validation, where applicable</li> <li>- Definitions of outcomes</li> <li>- Secondary outcomes, where appropriate</li> <li>- Follow-up period for outcome assessment, divided by group</li> </ul>                                                                                                                 | Sec 2.4-2.5<br>pg. 4                                                       |
| 9              | Statistics: the following areas are described comprehensively <ul style="list-style-type: none"> <li>- Statistical tests, packages/software used, and interpretation of significance</li> <li>- Confounders and their control, if known</li> <li>- Analysis approach (e.g. intention to treat/per protocol)</li> <li>- Sub-group analysis, if any</li> </ul>                                                                                      | Sec 2.6<br>pg. 4                                                           |
| <b>RESULTS</b> |                                                                                                                                                                                                                                                                                                                                                                                                                                                   |                                                                            |
| 10a            | Participants: the following areas are described comprehensively <ul style="list-style-type: none"> <li>- Flow of participants (recruitment, non-participation, cross-over and withdrawal, with reasons)</li> <li>- Population demographics (prognostic features, relevant socioeconomic features, and significant numerical differences)</li> </ul>                                                                                               | Table 1 & 2<br>pg. 9<br><br>Sec 3.1-3.2<br>pg. 4-5<br><br>Sec 3.4<br>pg. 5 |
| 10b            | Participant Comparison: the following areas are described comprehensively <ul style="list-style-type: none"> <li>- Table comparing demographics included</li> <li>- Differences, with statistical relevance</li> <li>- Any group matching, with methods</li> </ul>                                                                                                                                                                                | Tables 2 & 3<br><br>pg. 9                                                  |
| 10c            | Intervention: the following areas are described comprehensively <ul style="list-style-type: none"> <li>- Changes to interventions, with rationale and diagram, if appropriate</li> <li>- Learning required for interventions</li> <li>- Degree of novelty for intervention</li> </ul>                                                                                                                                                             | Sec 3.3<br>pg. 5<br><br>Table 4<br>pg. 10                                  |

|                     |                                                                                                                                                                                                                                                                                                                                                                                                                                                                                                                                          |                                                                                                              |
|---------------------|------------------------------------------------------------------------------------------------------------------------------------------------------------------------------------------------------------------------------------------------------------------------------------------------------------------------------------------------------------------------------------------------------------------------------------------------------------------------------------------------------------------------------------------|--------------------------------------------------------------------------------------------------------------|
| 11a                 | <p>Outcomes: the following areas are described comprehensively</p> <ul style="list-style-type: none"> <li>- Clinician-assessed and patient-reported outcomes for each group</li> <li>- Relevant photographs and imaging are desirable</li> <li>- Confounders to outcomes and which are adjusted</li> </ul>                                                                                                                                                                                                                               | <p>Sec 3.4<br/>pg. 5</p> <p>Figures<br/>1 &amp; 2<br/>pg. 8</p> <p>Tables<br/>5 &amp; 6<br/>pg. 10</p>       |
| 11b                 | <p>Tolerance: the following areas are described comprehensively</p> <ul style="list-style-type: none"> <li>- Assessment of tolerance</li> <li>- Loss to follow up, with reasons (percentage and fraction)</li> <li>- Cross-over with explanation</li> </ul>                                                                                                                                                                                                                                                                              | <p>Sec 3.4<br/>pg. 5</p> <p>Table 1<br/>pg. 9</p>                                                            |
| 11c                 | <p>Complications: the following areas are described comprehensively</p> <ul style="list-style-type: none"> <li>- Adverse events described</li> <li>- Classified according to Clavien-Dindo classification*</li> <li>- Mitigation for adverse events (blood loss, wound care, revision surgery should be specified)</li> </ul> <p>*Dindo D, Demartines N, Clavien P-A. Classification of Surgical Complications. A New Proposal with Evaluation in a Cohort of 6336 Patients and Results of a Survey. Ann Surg. 2004; 240(2): 205-213</p> | <p>Sec 3.4<br/>pg. 5</p> <p>Tables<br/>5 &amp; 6<br/>pg. 10</p>                                              |
| 12                  | <p>Key Results: the following areas are described comprehensively</p> <ul style="list-style-type: none"> <li>- Key results, including relevant raw data</li> <li>- Statistical analyses with significance</li> </ul>                                                                                                                                                                                                                                                                                                                     | <p>Sec<br/>3.1-3.4<br/>pg. 4-5</p> <p>Figures<br/>1 &amp; 2<br/>pg. 8</p> <p>Tables<br/>1-6<br/>pg. 9-10</p> |
| <b>DISCUSSION</b>   |                                                                                                                                                                                                                                                                                                                                                                                                                                                                                                                                          |                                                                                                              |
| 13                  | <p>Discussion: the following areas are described comprehensively</p> <ul style="list-style-type: none"> <li>- Conclusions and rationale</li> <li>- Reference to relevant literature</li> <li>- Implications to clinical practice</li> <li>- Comparison to current gold standard of care</li> <li>- Relevant hypothesis generation</li> </ul>                                                                                                                                                                                             | <p>Sec 4<br/>pg. 5-7</p>                                                                                     |
| 14                  | <p>Strengths and Limitations: the following areas are described comprehensively</p> <ul style="list-style-type: none"> <li>- Strengths of the study</li> <li>- Limitations and potential impact on results</li> <li>- Assessment of bias and management</li> </ul>                                                                                                                                                                                                                                                                       | <p>Sec 4<br/>pg. 5-7,<br/>especially<br/>final<br/>paragraph</p>                                             |
| 15                  | <p>Implications and Relevance: the following areas are described comprehensively</p> <ul style="list-style-type: none"> <li>- Relevance of findings and potential implications to clinical practice are detailed</li> <li>- Future research that is needed is described, with study designs detailed</li> </ul>                                                                                                                                                                                                                          | <p>Sec 4<br/>pg. 6</p> <p>Sec 4<br/>pg. 7</p>                                                                |
| <b>CONCLUSION</b>   |                                                                                                                                                                                                                                                                                                                                                                                                                                                                                                                                          |                                                                                                              |
| 16                  | <p>Conclusions:</p> <ul style="list-style-type: none"> <li>- Key conclusions are summarised</li> <li>- Key directions for future research are summarised</li> </ul>                                                                                                                                                                                                                                                                                                                                                                      | <p>Sec 5<br/>pg. 7</p>                                                                                       |
| <b>DECLARATIONS</b> |                                                                                                                                                                                                                                                                                                                                                                                                                                                                                                                                          |                                                                                                              |

|     |                                                                                  |                                      |
|-----|----------------------------------------------------------------------------------|--------------------------------------|
| 17a | Conflicts of interest<br>- Conflicts of interest, if any, are described          | Title<br>Page<br>& Author<br>Declar. |
| 17b | Funding<br>- Sources of funding (e.g. grant details), if any, are clearly stated | Title<br>Page<br>& Author<br>Declar. |
